# Supplementary material
Source: PubMed Central journal article supplement (PMC5442642)
Supplement: IAI.00198-17_zii999092061s1.pdf [file IAI.00198-17_zii999092061s1.pdf]

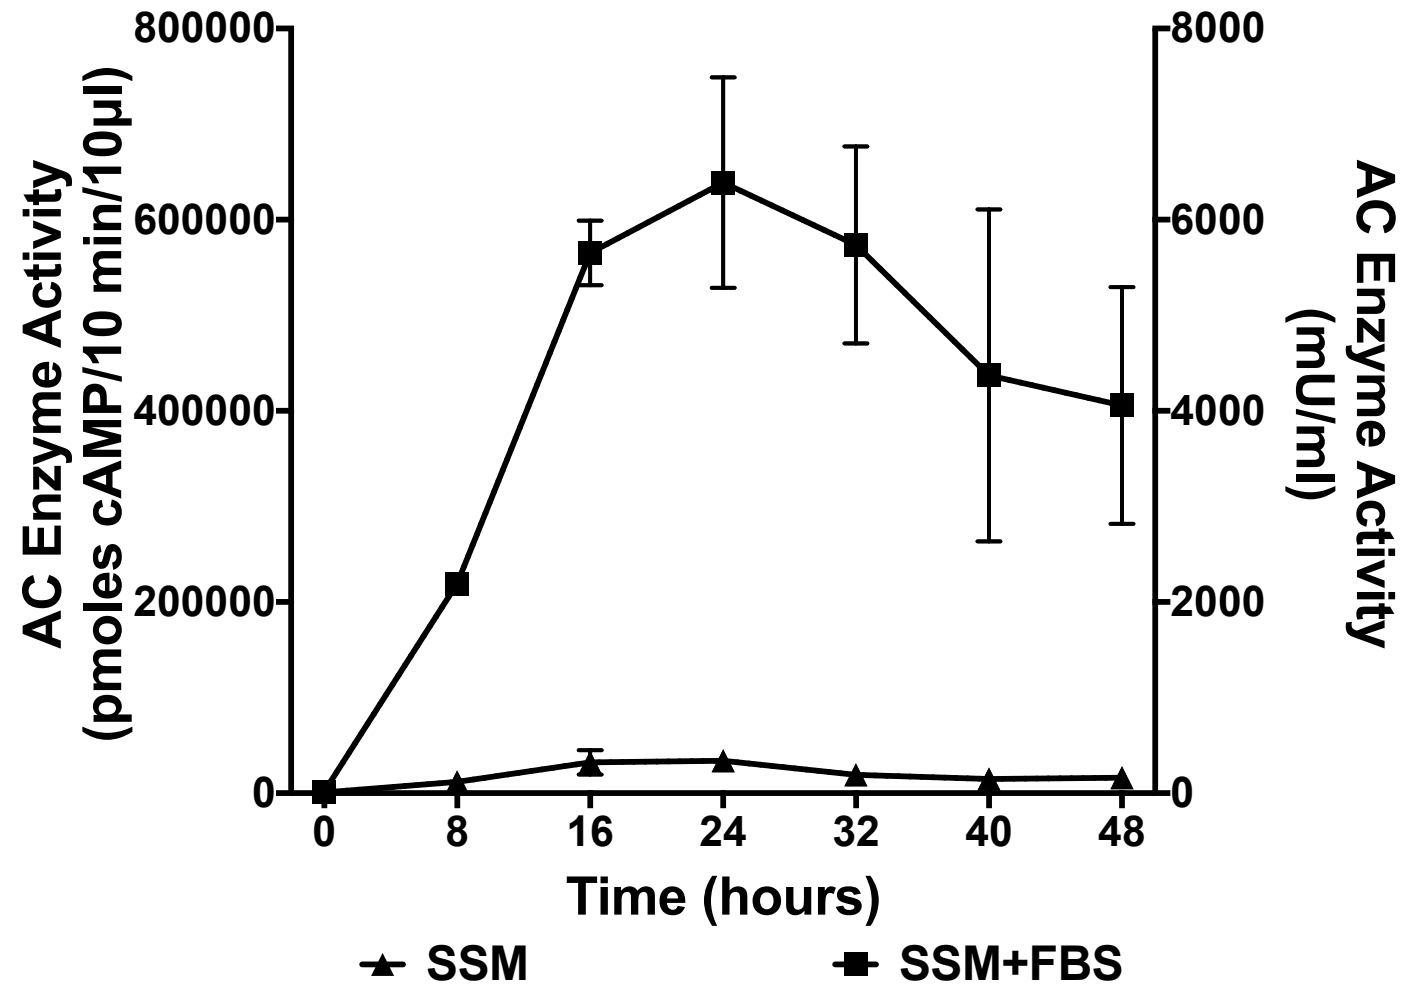

**Figure S1. Conversion of enzyme activity measurements to mU/ml.** *Bp* UT25 was grown in SSM +/- 10% FBS and samples were taken at indicated time points. The total fraction includes both culture supernatant and bacterial cells. AC enzyme activity was measured as described in Methods. Data represent the mean +/- SD of 3 independent experiments and is the same data presented in Figure 2A. One unit is defined as 1 µmol of cAMP formed in 1 minute at pH 8 at 30°C.
